# Supplementary material for: Molecular characterization and comparative genomic analysis of Acinetobacter baumannii isolated from the community and the hospital: an epidemiological study in Segamat, Malaysia
Source: PubMed Central journal article supplement (PMC10210948; doi:10.1099/mgen.0.000977), 2023-04-05
Supplement: mgen-9-977-s001.pdf [file mgen-9-977-s001.pdf]

## Supplementary Material\_S1

### **Molecular characterization and comparative genomic analysis of *Acinetobacter baumannii* isolated from the community and the hospital: an epidemiological study in Segamat, Malaysia**

Nazmul Hasan Muzahid<sup>1,\*</sup>, Md Hamed Hussain<sup>1</sup>, Marie Andrea Laetitia Huët<sup>1</sup>, Jacky Dwiyanto<sup>1</sup>, Tin Tin Su<sup>2</sup>, Daniel Reidpath<sup>2</sup>, Faizah Mustapha<sup>3</sup>, Qasim Ayub<sup>1,4,5</sup>, Hock Siew Tan<sup>1,5</sup> and Sadequr Rahman<sup>1,5,\*</sup>

<sup>1</sup>School of Science, Monash University Malaysia, 47500, Bandar Sunway, Selangor Darul Ehsan, Malaysia

<sup>2</sup>South East Asia Community Observatory (SEACO) and Global Public Health, Jeffrey Cheah School of Medicine and Health Sciences, Monash University Malaysia, Bandar Sunway, 47500, Subang Jaya, Selangor, Malaysia

<sup>3</sup>Department of Pathology, Hospital Segamat, Jalan Genuang, Bandar Putra, 85000, Segamat, Johor, Malaysia

<sup>4</sup>Monash University Malaysia Genomics Facility, 47500, Bandar Sunway, Selangor Darul Ehsan, Malaysia

<sup>5</sup>Tropical Medicine and Biology Multidisciplinary Platform, Monash University Malaysia, Bandar Sunway, 47500, Subang Jaya, Selangor, Malaysia.

#### **Corresponding author**

Nazmul Hasan Muzahid; [nazmul.muzahid@monash.edu](mailto:nazmul.muzahid@monash.edu)

Sadequr Rahman; [sadequr.rahman@monash.edu](mailto:sadequr.rahman@monash.edu)

**Table S1:** Details of *A. baumannii* isolates from the Segamat hospital, Malaysia

| SL No. | Strain ID  | Patient Age | Gender | Diagnosis                              | Isolation source  |
|--------|------------|-------------|--------|----------------------------------------|-------------------|
| 1      | H-AB-6657  | 78          | M      | Severe pneumoniae                      | -                 |
| 2      | H-AB-6668  | 63          | M      | Community acquired pneumonia           | Blood             |
| 3      | H-AB-7940  | 40          | F      | Deep vein thrombosis                   | Blood             |
| 4      | H-AB-10112 | 87          | F      | Ventilator associate pneumonia         | tracheal aspirate |
| 5      | H-AB-10156 | 73          | M      | Invasive Klebsiella Pneumonia Syndrome | Sputum CRS        |
| 6      | H-AB-10299 | 79          | M      | Septic shock                           | tracheal aspirate |
| 7      | H-AB-10858 | 55          | F      | Septic shock                           | tracheal aspirate |
| 8      | H-AB-11553 | 75          | M      | community acquired pneumonia           | tracheal aspirate |
| 9      | H-AB-11699 | 50          | M      | CRBSI                                  | blood             |
| 10     | H-AB-79532 | 28          | M      | Traumatic Brain Injury                 | tracheal aspirate |
| 11     | H-AB-52446 | 39          | M      |                                        | Urine             |
| 12     | H-AB-80330 | 43          | M      | Severe leptospirosis                   | Tracheal aspirate |
| 13     | H-AB-80359 | 44          | M      | Cryptococcal meningitis                | Blood             |
| 14     | H-AB-80400 | 62          | M      | Pneumonia                              | Tracheal aspirate |
| 15     | H-AB-80361 | 44          | M      | Cryptococcal meningitis                | Blood             |

**Table S2:** Details of *A. baumannii* isolates from the community in Segamat, Malaysia

| Sample Collection Year | Stoolcode | Household | Location | Relationship | Gender | Age | Ethnicity | Occupation   | Chronic diabetes |
|------------------------|-----------|-----------|----------|--------------|--------|-----|-----------|--------------|------------------|
| 2018                   | C-15      | 8         | Chaah    | Head         | Male   | 62  | Indian    | agricultural | Yes              |
| 2018                   | C-28      | 17        | Chaah    | Wife         | Female | 50  | Indian    | homemaker    | No               |
| 2018                   | C-55      | 38        | Bekok    | Wife         | Female | 33  | Jakun     | homemaker    | No               |
| 2018                   | C-61      | 35        | Bekok    | Head         | Male   | 39  | Chinese   | craft        | No               |
| 2018                   | C-65      | 44        | Chaah    | Head         | Male   | 69  | Indian    | unemployed   | Yes              |
| 2018                   | C-72      | 103       | Chaah    | Head         | Female | 54  | Indian    | service      | Yes              |
| 2018                   | C-95      | 113       | Chaah    | Head         | Male   | 36  | Indian    | service      | No               |
| 2018                   | C-98      | 125       | Chaah    | Wife         | Female | 46  | Indian    | homemaker    | No               |
| 2018                   | C-102     | 33        | Chaah    | Head         | Male   | 54  | Indian    | elementary   | No               |
| 2019                   | C-39      | 190       | Bekok    | Wife         | female | 46  | Jakun     | homemaker    | No               |
| 2019                   | C-59      | 108       | Chaah    | Head         | Male   | 52  | Indian    | unemployed   | Yes              |
| 2019                   | C-64      | 113       | Chaah    | Head         | Male   | 37  | Indian    | service      | No               |

**Table S3:** MLST Profiles of *A. baumannii* hospital and community Isolates

| SL | Isolates | ST   | CC     | International Clone |
|----|----------|------|--------|---------------------|
| 1  | H-7940   | 208  | 208/92 | IC-2                |
| 2  | H-10156  | 208  | 208/92 | IC-2                |
| 3  | H-10858  | 208  | 208/92 | IC-2                |
| 4  | H-11699  | 208  | 208/92 | IC-2                |
| 5  | H-52446  | 208  | 208/92 | IC-2                |
| 6  | H-80330  | 208  | 208/92 | IC-2                |
| 7  | H-80400  | 208  | 208/92 | IC-2                |
| 8  | H-11553  | 447  | 447    | IC-8                |
| 9  | H-80359  | 547  | 208/92 | IC-2                |
| 10 | H-80361  | 547  | 208/92 | IC-2                |
| 11 | H-79532  | 2241 | 642    | ND                  |
| 12 | H-6657   | 684  | 208/92 | IC-2                |
| 13 | H-10112  | 684  | 208/92 | IC-2                |
| 14 | H-6668   | 2237 | ND     | ND                  |
| 15 | H-10299  | 2238 | ND     | ND                  |
| 16 | C-28     | 1463 | ND     | ND                  |
| 17 | C-65     | 1930 | 1108   | ND                  |
| 18 | C-98     | 231  | 231    | IC-1                |
| 19 | C-64     | 1912 | ND     | ND                  |
| 20 | C-39     | 485  | 1138   | ND                  |
| 21 | C-15     | 2230 | ND     | ND                  |
| 22 | C-55     | 503  | 1171   | ND                  |
| 23 | C-61     | 2232 | 953    | ND                  |
| 24 | C-72     | 128  | ND     | IC-2                |
| 25 | C-95     | 2234 | ND     | ND                  |
| 26 | C-102    | 2235 | ND     | ND                  |
| 27 | C-59     | 2236 | ND     | ND                  |

NB; SL 1-15; Hospital isolates, SL 16-27; Community isolates, ST; Sequence Type, CC; Clonal complex, IC; International clone, ND; Not determined

**Table S4:** Results from chi-square test for the presence and absence of type VI secretion system (T6SS) genes in hospital and community isolates.

| Gene             | Presence | Hospital |      | Community |      | Total<br>N | chi-squared<br>P value |
|------------------|----------|----------|------|-----------|------|------------|------------------------|
|                  |          | n        | %    | n         | %    |            |                        |
| <i>tssA</i>      | Present  | 12       | 0.86 | 2         | 0.14 | 14         | 0.007                  |
|                  | Absent   | 3        | 0.23 | 10        | 0.77 | 13         | 0.05                   |
| <i>tssB</i>      | Present  | 12       | 0.92 | 1         | 0.08 | 13         | 0.002                  |
|                  | Absent   | 3        | 0.21 | 11        | 0.79 | 14         | 0.03                   |
| <i>tssC</i>      | Present  | 12       | 0.92 | 1         | 0.08 | 13         | 0.002                  |
|                  | Absent   | 3        | 0.21 | 11        | 0.79 | 14         | 0.03                   |
| <i>hcp/tssD</i>  | Present  | 12       | 0.92 | 1         | 0.08 | 13         | 0.002                  |
|                  | Absent   | 3        | 0.21 | 11        | 0.79 | 14         | 0.03                   |
| <i>tssE</i>      | Present  | 12       | 0.92 | 1         | 0.08 | 13         | 0.002                  |
|                  | Absent   | 3        | 0.21 | 11        | 0.79 | 14         | 0.03                   |
| <i>tssF</i>      | Present  | 12       | 0.92 | 1         | 0.08 | 13         | 0.002                  |
|                  | Absent   | 3        | 0.21 | 11        | 0.79 | 14         | 0.03                   |
| <i>tssG</i>      | Present  | 12       | 0.92 | 1         | 0.08 | 13         | 0.002                  |
|                  | Absent   | 3        | 0.21 | 11        | 0.79 | 14         | 0.03                   |
| <i>clpV/tssH</i> | Present  | 12       | 0.86 | 2         | 0.14 | 14         | 0.007                  |
|                  | Absent   | 3        | 0.23 | 10        | 0.77 | 13         | 0.05                   |
| <i>vgrG/tssI</i> | Present  | 14       | 0.78 | 4         | 0.22 | 18         | 0.02                   |
|                  | Absent   | 1        | 0.11 | 8         | 0.89 | 9          | 0.02                   |
| <i>tssK</i>      | Present  | 12       | 0.86 | 2         | 0.14 | 14         | 0.007                  |
|                  | Absent   | 3        | 0.23 | 10        | 0.77 | 13         | 0.05                   |
| <i>tssL</i>      | Present  | 12       | 0.86 | 2         | 0.14 | 14         | 0.007                  |
|                  | Absent   | 3        | 0.23 | 10        | 0.77 | 13         | 0.05                   |
| <i>tssM</i>      | Present  | 12       | 0.92 | 1         | 0.08 | 13         | 0.002                  |
|                  | Absent   | 3        | 0.21 | 11        | 0.79 | 14         | 0.03                   |
| <i>tagX</i>      | Present  | 12       | 0.86 | 2         | 0.14 | 14         | 0.007                  |
|                  | Absent   | 3        | 0.23 | 10        | 0.77 | 13         | 0.05                   |
| <i>tse2</i>      | Present  | 1        | 0.25 | 3         | 0.75 | 4          | 0.3                    |
|                  | Absent   | 14       | 0.61 | 9         | 0.39 | 23         | 0.29                   |
| <i>tse4</i>      | Present  | 0        | 0.00 | 1         | 1.00 | 1          | NA                     |
|                  | Absent   | 15       | 0.58 | 11        | 0.42 | 26         | 0.43                   |

**Table S5:** Multiple variants were observed between 27 sequenced hospital and community isolates with the reference strain *A. baumannii* AC30. Here, SNP stands for Single Nucleotide Polymorphism, MNP is Multiple Nucleotide Polymorphism, INS is Insertion, DEL is Deletion and Complex is the combination of snp/mnp.

| <b>Isolates</b> | <b>SNP</b> | <b>MNP</b> | <b>Ins</b> | <b>Del</b> | <b>Complex</b> |
|-----------------|------------|------------|------------|------------|----------------|
| <b>C-15</b>     | 36966      | 427        | 201        | 196        | 7131           |
| <b>C-28</b>     | 36447      | 155        | 169        | 183        | 7414           |
| <b>C-39</b>     | 35645      | 141        | 166        | 172        | 6758           |
| <b>C-55</b>     | 35956      | 416        | 171        | 163        | 6773           |
| <b>C-59</b>     | 36887      | 449        | 212        | 201        | 6938           |
| <b>C-61</b>     | 36572      | 167        | 161        | 196        | 7202           |
| <b>C-64</b>     | 37292      | 395        | 198        | 192        | 7134           |
| <b>C-65</b>     | 35985      | 119        | 152        | 149        | 6776           |
| <b>C-72</b>     | 38386      | 440        | 247        | 209        | 7770           |
| <b>C-95</b>     | 35398      | 335        | 158        | 152        | 6434           |
| <b>C-98</b>     | 37745      | 140        | 151        | 150        | 7489           |
| <b>C-102</b>    | 36205      | 145        | 175        | 222        | 7174           |
| <b>H-6657</b>   | 653        | 3          | 4          | 9          | 187            |
| <b>H-6668</b>   | 37320      | 1622       | 194        | 207        | 7492           |
| <b>H-7940</b>   | 466        | 5          | 8          | 7          | 151            |
| <b>H-10112</b>  | 452        | 0          | 2          | 8          | 135            |
| <b>H-10156</b>  | 478        | 6          | 7          | 7          | 161            |
| <b>H-10299</b>  | 37773      | 128        | 193        | 182        | 7418           |
| <b>H-10858</b>  | 469        | 9          | 8          | 8          | 148            |
| <b>H-11553</b>  | 37619      | 126        | 184        | 186        | 7633           |
| <b>H-11699</b>  | 447        | 2          | 6          | 5          | 144            |
| <b>H-52446</b>  | 504        | 8          | 9          | 3          | 175            |
| <b>H-79532</b>  | 39120      | 400        | 223        | 227        | 7822           |
| <b>H-80330</b>  | 476        | 8          | 8          | 6          | 148            |
| <b>H-80359</b>  | 452        | 2          | 7          | 5          | 168            |
| <b>H-80361</b>  | 448        | 7          | 6          | 5          | 159            |
| <b>H-80400</b>  | 473        | 6          | 8          | 6          | 155            |

**Table S6:** Profiling of CRISPR-Cas loci among the community and hospital *A. baumannii* strains

| Strains | Number of CRISPR Arrays | CRISPR repeat length | CRISPR length | Number of Spacers per Strain | Repeat sequence                                                |
|---------|-------------------------|----------------------|---------------|------------------------------|----------------------------------------------------------------|
| C-15    | ND                      | ND                   | ND            | ND                           | ND                                                             |
| C-28    | 2                       | 28, 28               | 9096, 327     | 151, 5                       | TTTCTAAATGGCGTATGCCGCCATGAAC                                   |
| C-39    | 2                       | 28, 28               | 2429, 4583    | 40, 76                       | GTTTCATGGCGGCATACGCCATTTAGAAA/<br>TTTCTAAATCATCTATGCGATGAAGAAC |
| C-55    | ND                      | ND                   | ND            | ND                           | ND                                                             |
| C-59    | 1                       | 28                   | 447           | 7                            | TTTCTAAGCTGCCTATACGGCAGTGAAC                                   |
| C-61    | 2                       | 28, 28               | 5129, 1232    | 85, 20                       | TTTCTAAATGGCGTATGCCGCCATGAAC/<br>GTTTCATGGCGGCATACGCCATTTAGAAA |
| C-64    | ND                      | ND                   | ND            | ND                           | ND                                                             |
| C-65    | ND                      | ND                   | ND            | ND                           | ND                                                             |
| C-72    | 1                       | 28                   | 1167          | 19                           | GTTTCGTCATCGCCCAGATGATTTAGAAA                                  |
| C-95    | 1                       | 28                   | 3510          | 58                           | GTTTCATGGCGGCATACGCCATTTAGAAA                                  |
| C-98    | 1                       | 28                   | 3449          | 57                           | GTTTCATGGCGGCATACGCCATTTAGAAA                                  |
| C-102   | 1                       | 28                   | 3813          | 63                           | TTTCTAAATGGCGTATGCCGCCATGAAC                                   |
| H-6657  | ND                      | ND                   | ND            | ND                           | ND                                                             |
| H-6668  | 1                       | 28                   | 8676          | 144                          | GTTTCATGGCGGCATACGCCATTTAGAAA                                  |
| H-7940  | ND                      | ND                   | ND            | ND                           | ND                                                             |
| H-10112 | ND                      | ND                   | ND            | ND                           | ND                                                             |
| H-10156 | ND                      | ND                   | ND            | ND                           | ND                                                             |
| H-10858 | ND                      | ND                   | ND            | ND                           | ND                                                             |
| H-10299 | ND                      | ND                   | ND            | ND                           | ND                                                             |
| H-11553 | ND                      | ND                   | ND            | ND                           | ND                                                             |
| H-11699 | ND                      | ND                   | ND            | ND                           | ND                                                             |
| H-52446 | ND                      | ND                   | ND            | ND                           | ND                                                             |
| H-79532 | 2                       | 28, 28               | 4547, 865     | 75, 14                       | TTTCTAAATCATCTGGGCGATGACGAAC,<br>GTTGTTTCATCGCATAGATGATTTAGAAA |
| H-80330 | ND                      | ND                   | ND            | ND                           | ND                                                             |
| H-80359 | ND                      | ND                   | ND            | ND                           | ND                                                             |
| H-80361 | ND                      | ND                   | ND            | ND                           | ND                                                             |
| H-80400 | ND                      | ND                   | ND            | ND                           | ND                                                             |

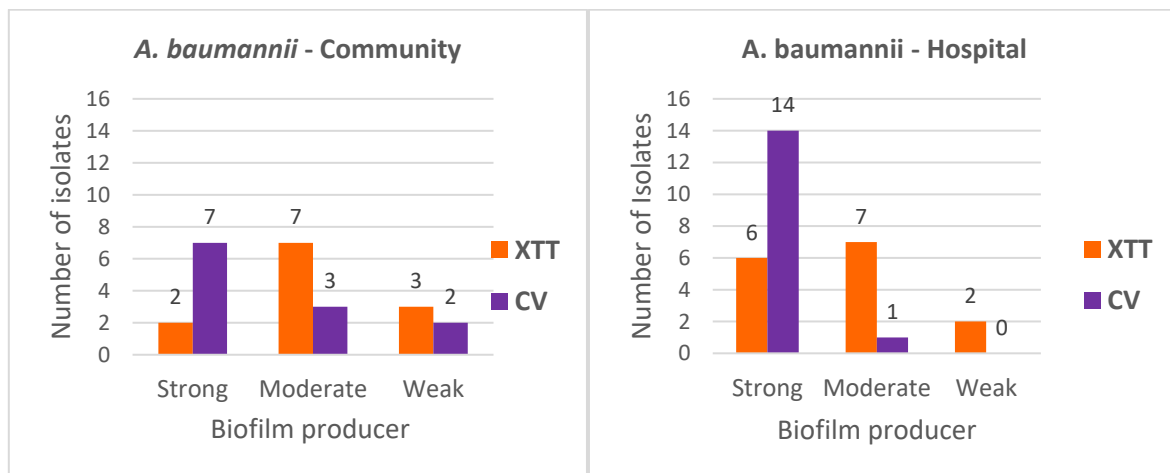

**Fig. S1:** Biofilm-forming ability of the community (n = 12) and hospital (n = 15) *A. baumannii* isolates. The biofilm producers were classified into 4 groups consisting of strong, moderate, weak, and non-biofilm producers according to [38].

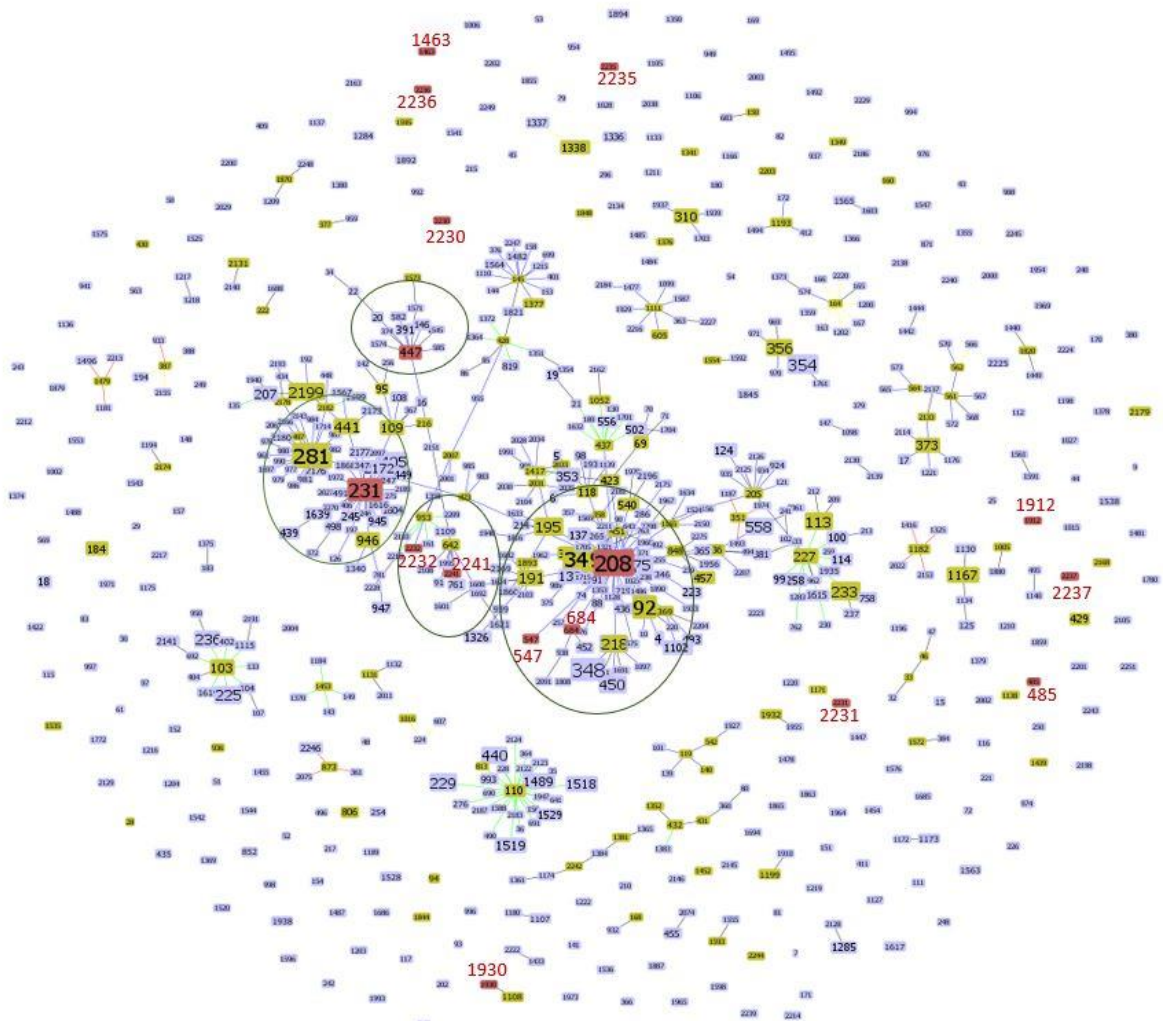

**Fig. S2 Population snapshot.** goeBURST analysis of 2275 ST present in the PubMLST database. The red colour STs annotated here are from the present study. The study's largest CCs are marked with a green circle (CC-208, CC-231, CC-447, CC-642 and CC-953). The snapshots here were created with groups defined at a TLV (Triple locus variant) level.



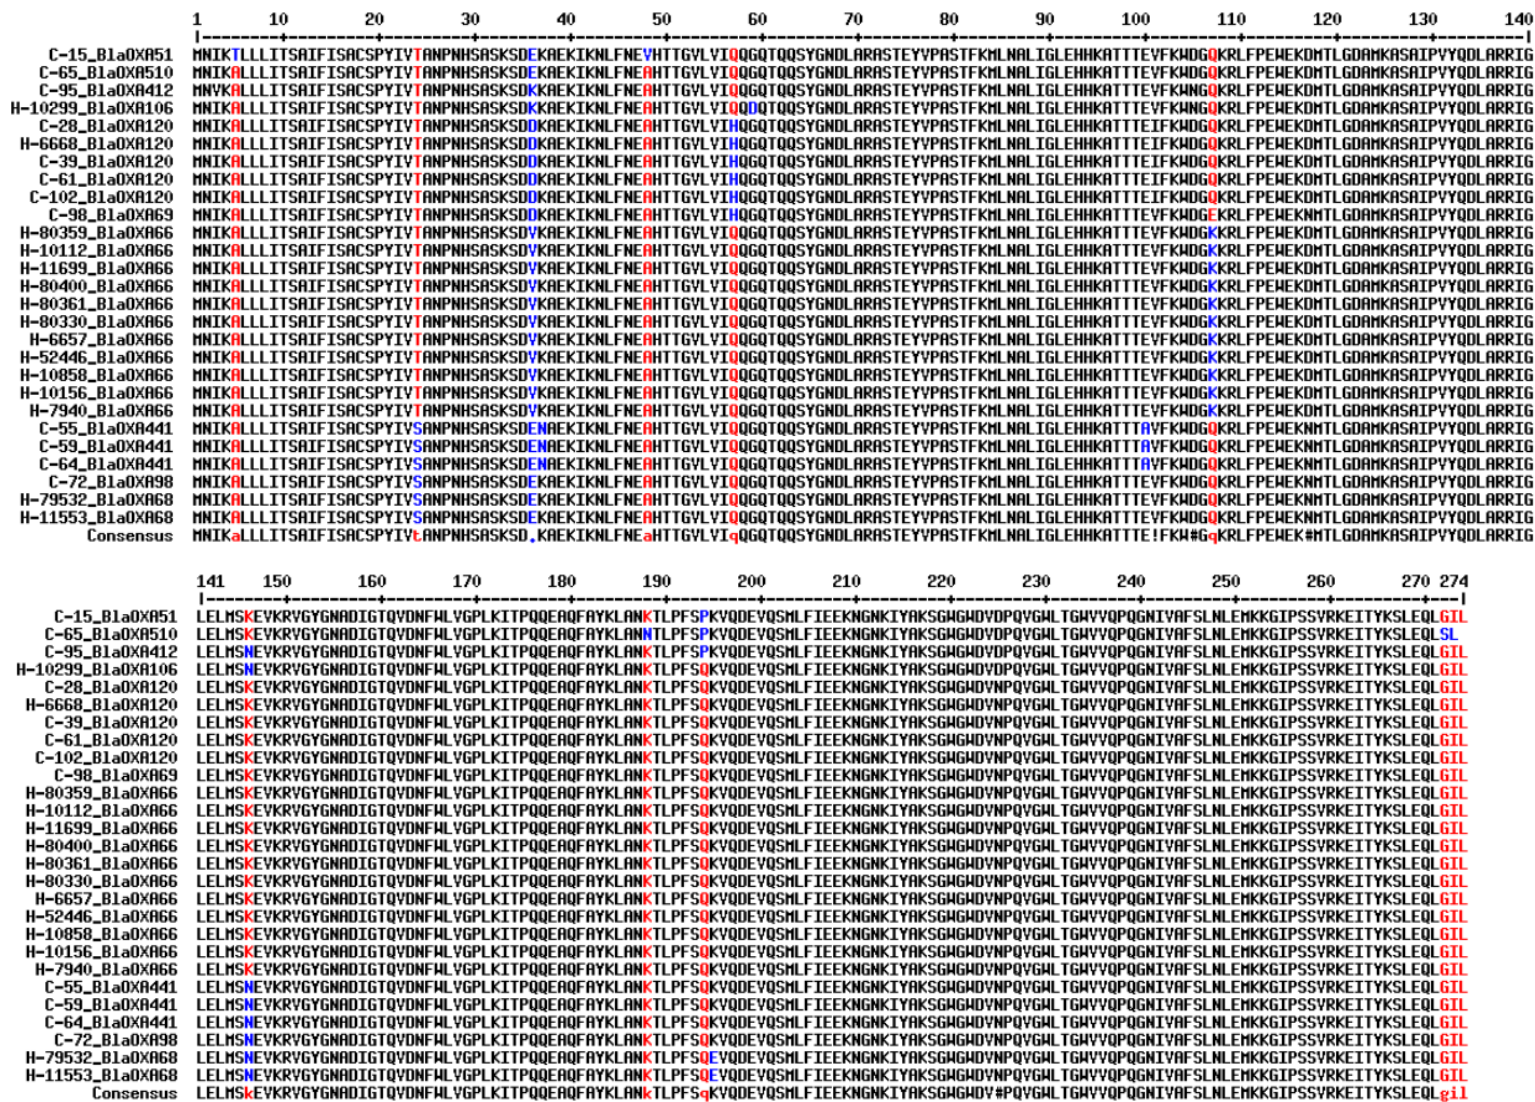

Fig S3: Multiple sequence alignment of translated OXA-51 type gene of 27 hospital and community

*A. baumannii* isolates. Here black color sequences showing the high consensus alignment. Red color reparts low consensus and blue indicate neutral consensus.



**Fig S4: Multiple sequence alignment of translated class C beta lactamase ADC type gene of 27 hospital and community *A. baumannii* isolates.** Here black color sequences showing the high consensus alignment. Red color represents low consensus and blue indicate neutral consensus.

## Supplementary text S1

### Experimental Methods:

#### DNA extraction using heat boiling method

In details, 2 to 3 colonies from fresh culture were transferred in a sterile PCR tube containing 50  $\mu$ L of sterile ultrapure water. The suspension was then boiled at 95°C for 5 minutes to allow cell lysis and extraction of DNA. After that, the PCR tubes were placed on ice for 5 minutes followed by centrifugation at 16000 *g* for 5 minutes. The supernatant containing the bacterial DNA was then transferred to a new sterile PCR tube.

**Table S7:** Primers used in this study

| Gene Targeted | Primer | Primer Sequences (5'→3') | Expected Amplicon Size |
|---------------|--------|--------------------------|------------------------|
| 16s rRNA      | 27F    | TACGGYTACCTTGTTACGACTT   | 1465                   |
|               | 1492R  | AGAGTTTGATCMTGGCTCAG     |                        |
| <i>gyrB</i>   | Sp2F   | GTCCTGATCCGAAATTCTCG     | 490                    |
|               | Sp4R   | AACGGAGCTTGTCAGGGTTA     |                        |

#### PCR Amplification and Sequencing of 16S rRNA Gene

**Table S8:** Reagent conditions for 16S rRNA PCR assay

| Reagent                 | Initial Concentration | Final Concentration | Volume per reaction/ $\mu$ l |
|-------------------------|-----------------------|---------------------|------------------------------|
| MyTaq Red Mix (Bioline) | 2x                    | 1x                  | 25                           |

|                            |       |        |    |
|----------------------------|-------|--------|----|
| 27F (Forward primer)       | 10 µM | 0.4 µM | 2  |
| 1492R (Reverse primer)     | 10 µM | 0.4 µM | 2  |
| DNA Template               | -     | -      | 5  |
| Water (ddH <sub>2</sub> O) | -     | -      | 16 |
| <b>Total Volume</b>        | -     | -      | 50 |

**Table S9:** Reaction conditions for 16S rRNA PCR assay

| Amplification step    | Temperature | Time     |
|-----------------------|-------------|----------|
| Initial Denaturation  | 95°C        | 10min    |
| 30 cycles             | 95°C        | 1min     |
|                       | 55°C        | 1min     |
|                       | 72°C        | 1min 30s |
| Final Elongation step | 72°C        | 15min    |

### Screening of PCR products

All 16S rRNA PCR amplicon products were subjected to electrophoresis using 1.2% agarose gel along with a 1 kb DNA ladder (Gene Ruler, Thermo Scientific). The agarose gel was run at 80V for 40 minutes and visualised using SafeView™ DNA Stain (ABM) and GelDoc™ EZ Gel Documentation System (Bio-Rad). After that, PCR products were sent to First BASE DNA Sequencing Singapore (<https://order.base-asia.com/>) for Sanger sequencing

### Detection of *Acinetobacter baumannii* using Species-specific *gyrB* gene

**Table S10:** Reagent conditions for *A. baumannii* using Species-specific *gyrB* gene PCR assay

| Reagent                    | Initial Concentration | Final Concentration | Volume per reaction/µl |
|----------------------------|-----------------------|---------------------|------------------------|
| MyTaq Red Mix (Bioline)    | 2x                    | 1x                  | 12.5                   |
| Sp2F (Forward primer)      | 10 µM                 | 0.4 µM              | 0.5                    |
| Sp4R (Reverse primer)      | 10 µM                 | 0.4 µM              | 0.5                    |
| DNA Template               | -                     | -                   | 1                      |
| Water (ddH <sub>2</sub> O) | -                     | -                   | 10.5                   |
| <b>Total Volume</b>        |                       |                     | 25                     |

**Table S11:** Reaction conditions for *A. baumannii* using Species-specific *gyrB* gene PCR assay

| Amplification step    | Temperature | Time  |
|-----------------------|-------------|-------|
| Initial Denaturation  | 94°C        | 2min  |
| 25 cycles             | 94°C        | 1min  |
|                       | 60°C        | 30s   |
|                       | 72°C        | 1min  |
| Final Elongation step | 72°C        | 10min |

## **Biofilm Formation Assay**

100  $\mu$ l of TSB medium supplemented with 0.2% glucose was added to each well. Using overnight bacterial culture, the cell suspension was adjusted to 0.5 McFarland standard in TSB supplemented with 0.2% glucose. 100  $\mu$ l of each suspension was inoculated to each well. The microplates were incubated at 37°C for 20 hours for biofilm production.

## **XTT reduction assay**

XTT assay was performed following the method used by (Lin et al., 2020) with some modifications. Fresh XTT solution was made by dissolving 1.5 mg XTT (Sigma) in 1.5 ml prewarmed (37 °C) physiological saline before each assay. The solution was filter-sterilized and then supplemented with 0.4mM of 300  $\mu$ l menadione solution, containing 1.72 mg menadione (Sigma) in 10 ml acetone. After production of biofilm, the wells were washed with PBS. In each well 12  $\mu$ l of XTT-menadione solution and 200  $\mu$ l of fresh TSB medium were added. Plates were incubated for one hour at 37 °C. After incubation, 100  $\mu$ l of well contents transferred to a new microtiter plate and the absorbance was measured with a microplate reader (Tecan, Switzerland) at 490 nm. Negative control wells were included in the plate and *Staphylococcus aureus* ATCC 6538P which will give strong biofilm formation was used as the positive control. The assay was performed in three biological and technical replicates.

## **Crystal violet assay (CV assay)**

Following the biofilm formation assay, after 24 hours of incubation at 37°C, the bacteria culture was discarded. To remove the remaining bacteria cells the plate was washed twice with 200  $\mu$ l of sterile phosphate-buffered saline followed by heat fixation at 60°C for 1 hour. Adherent bacteria were stained with 200  $\mu$ l of 0.1% Crystal violet for 20 mins. Excess stain was washed under running tap water. Subsequently, the microplates were vigorously tapped on napkins to remove any excess liquid. 200  $\mu$ l of 95% ethanol was added in each well. Following a thirty minute period, 100  $\mu$ l of well contents transferred to a new microtiter plate and the absorbance of each well was measured with a microplate reader (Tecan, Switzerland) at 595 nm. Negative control wells were included in the plate and *Staphylococcus aureus* ATCC 6538P which will give strong biofilm formation was used as the positive control. The assay was performed in three biological and technical replicates.

The average OD of the negative wells (with TSB only) was set as the cut-off value (OD<sub>c</sub>). Biofilm producers were classified into different categories according to their OD measurement (Zhang

et al., 2016) as non-biofilm producer ( $OD$  of isolates  $\leq OD_c$ ), weak biofilm producer ( $OD_c < OD < 2 \times OD_c$ ), moderate biofilm producer ( $2 \times OD_c < OD \leq 4 \times OD_c$ ) and strong biofilm producer ( $4 \times OD_c < OD$  of isolates).
